# Supplementary material for: Identification of an EMT-related lncRNA signature and LINC01116 as an immune-related oncogene in hepatocellular carcinoma
Source: publisher site journal article supplement (doi:10.18632/aging.203888), 2022-02-11
Supplement: Supplementary file [file aging-v14i3-203888-supplementary-material-SD1.pdf]

**SUPPLEMENTARY FIGURES**

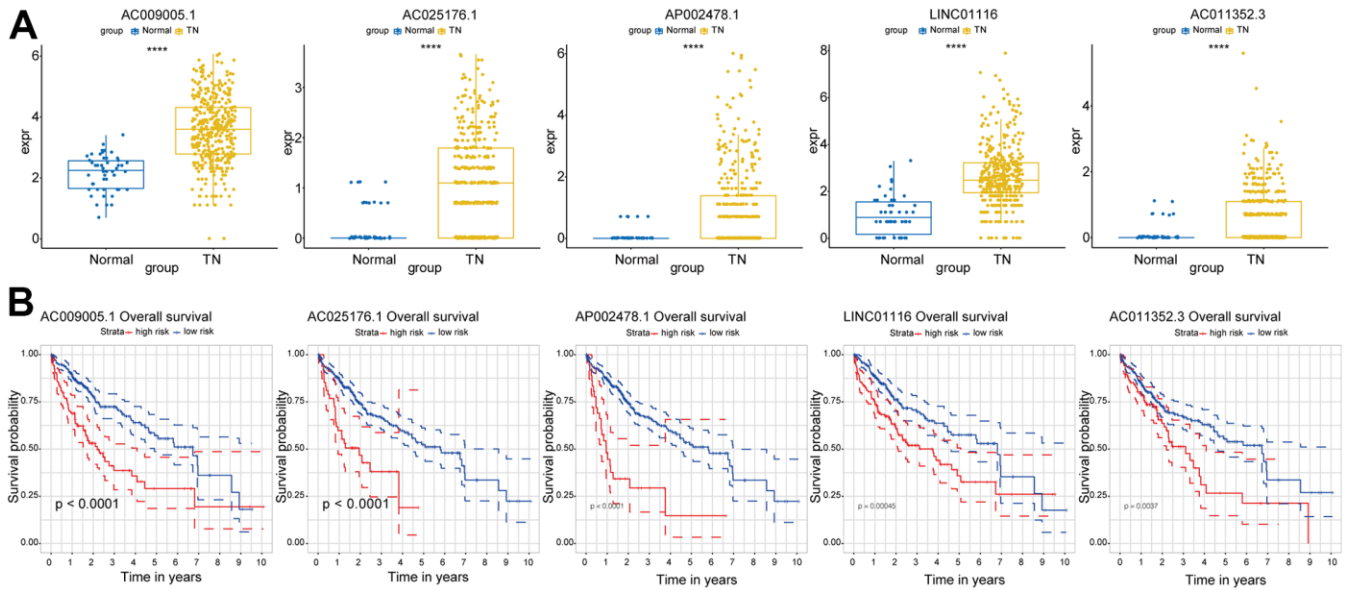

**Supplementary Figure 1.** (A) The expression levels of 5 hub lncRNAs in HCC specimens of TCGA. (B) Kaplan–Meier survival analysis of 5 hub lncRNAs.

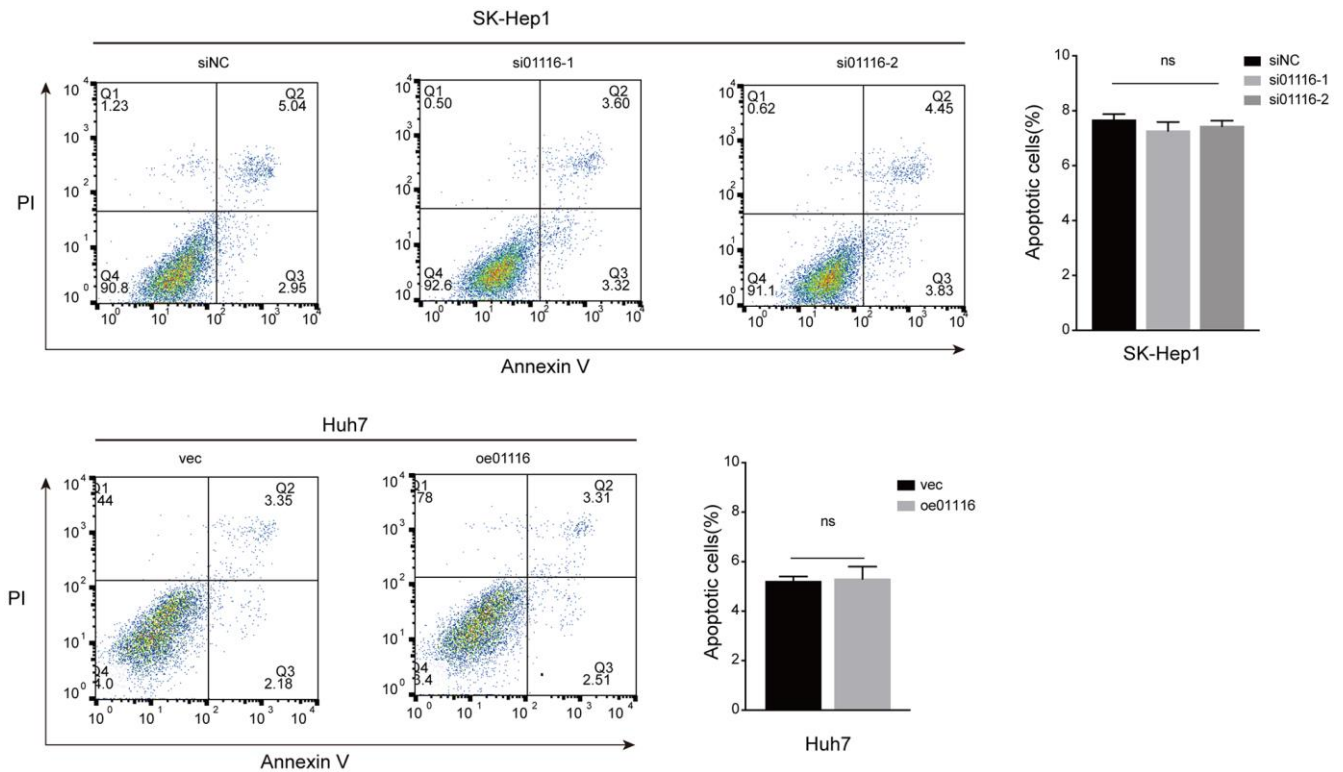

**Supplementary Figure 2.** Cell apoptosis was examined by the flow cytometry.
